# Supplementary material for: Design, Synthesis, Computational Studies, and Anti-Proliferative Evaluation of Novel Ethacrynic Acid Derivatives Containing Nitrogen Heterocycle, Urea, and Thiourea Moieties as Anticancer Agents
Source: MDPI journal article supplement (doi:10.3390/molecules29071437), 2024-03-23
Supplement: s1 [file s1]

## SUPPORTING INFORMATION

# Design, Synthesis, Computational Studies, and Anti-proliferative Evaluation of Novel Ethacrynic Acid Derivatives Containing Nitrogen Heterocycle, Urea, and Thiourea Moieties as Anticancer Agents

Abdelmoula El Abbouchi<sup>1,2</sup>, Khaoula Mkhayar<sup>3</sup>, Souad Elkhatabi<sup>3</sup>, Nabil El Brahmi<sup>1</sup>, Marie-Aude Hiebel<sup>2</sup>, Jérôme Bignon<sup>4</sup>, Gérald Guillaumet<sup>1,2,\*</sup>, Franck Suzenet<sup>2,\*</sup> and Saïd El Kazzouli<sup>1,\*</sup>

<sup>1</sup> Euromed Research Center, Euromed Faculty of Pharmacy and School of Engineering in Biomedical and Biotechnology, Euromed University of Fes (UEMF), Meknes Road, Fez 30000, Morocco

<sup>2</sup> Institut de Chimie Organique et Analytique, Université d'Orléans, UMR CNRS 7311, BP 6759, CEDEX 2, 45067 Orléans, France

<sup>3</sup> Laboratory of Engineering, Systems and Applications, National School of Applied Sciences, Sidi Mohamed Ben Abdellah-Fez University, BP Box 72, Fez, Morocco

<sup>4</sup> Institut de Chimie des Substances Naturelles, CNRS, Université Paris-Saclay, 91190 Gif-sur-Yvette, France

\* Correspondence: gerald.guillaumet@univ-orleans.fr (G.G.); franck.suzenet@univ-orleans.fr (F.S.); s.elkazzouli@ueuromed.org (S.E.K.)

### Contents :

|                                                                                          |      |
|------------------------------------------------------------------------------------------|------|
| NMR ( <sup>1</sup> H and <sup>13</sup> C) for compounds 1-10, 16-18, 22, 23 and 24 ..... | 2-19 |
|------------------------------------------------------------------------------------------|------|

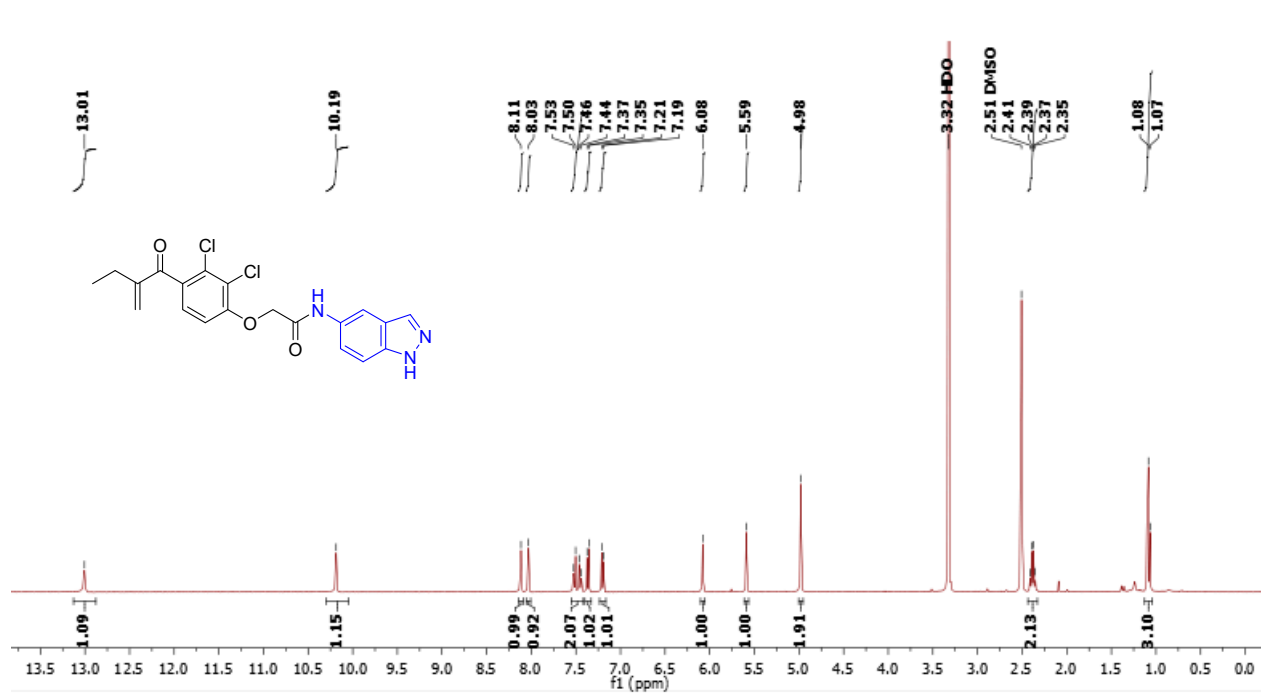

<sup>1</sup>H NMR spectrum (400 MHz, DMSO) of compound 1

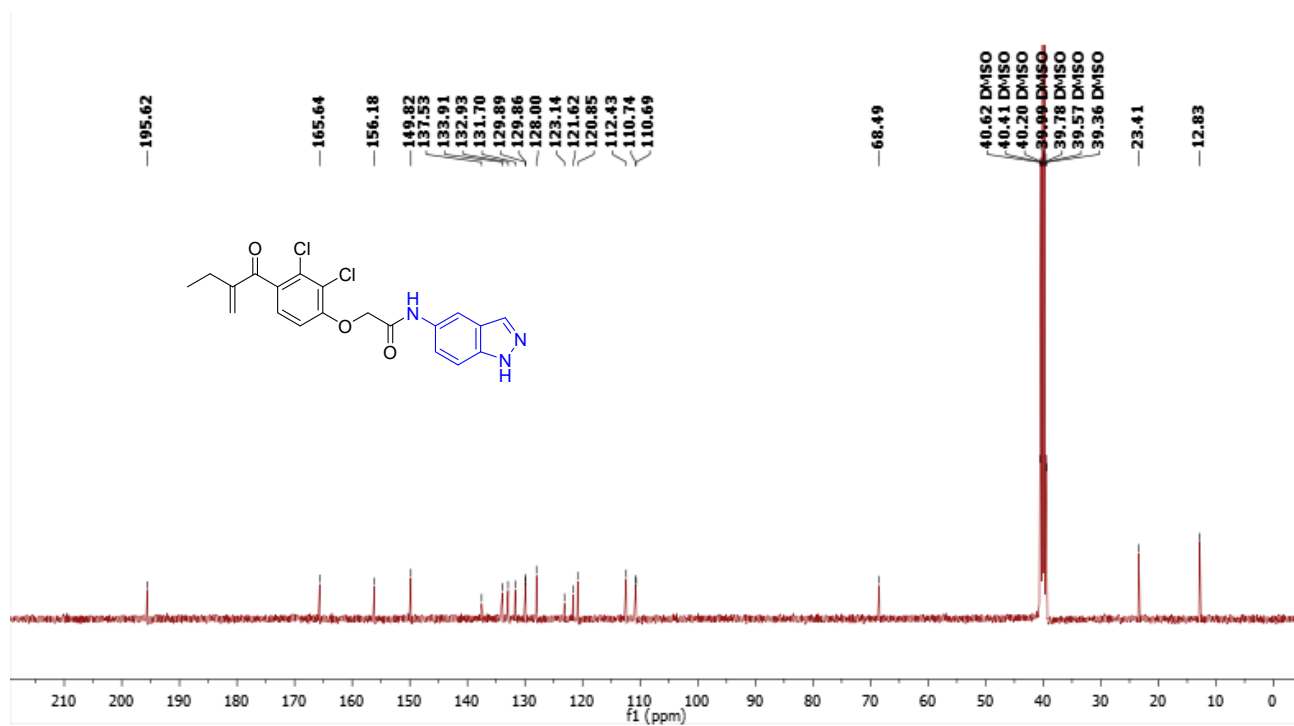

<sup>13</sup>C NMR spectrum (101 MHz, DMSO) of compound 1

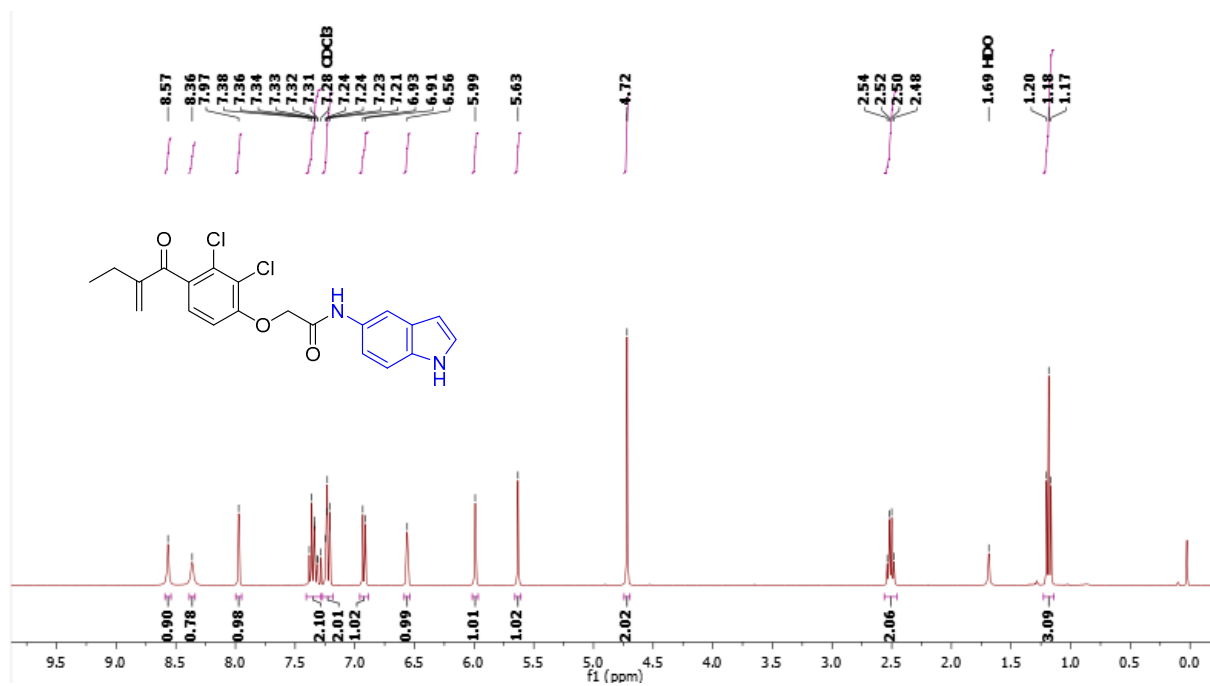

<sup>1</sup>H NMR spectrum (400 MHz, CDCl<sub>3</sub>) of compound 2

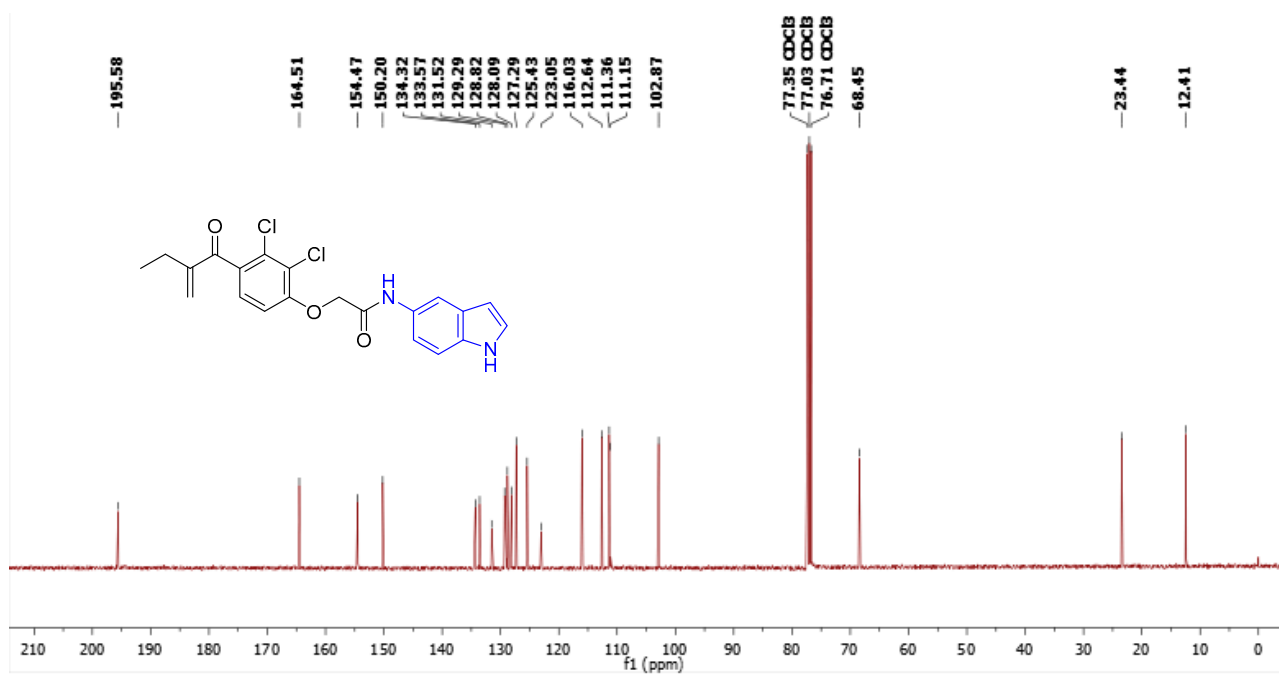

<sup>13</sup>C NMR spectrum (101 MHz, CDCl<sub>3</sub>) of compound 2

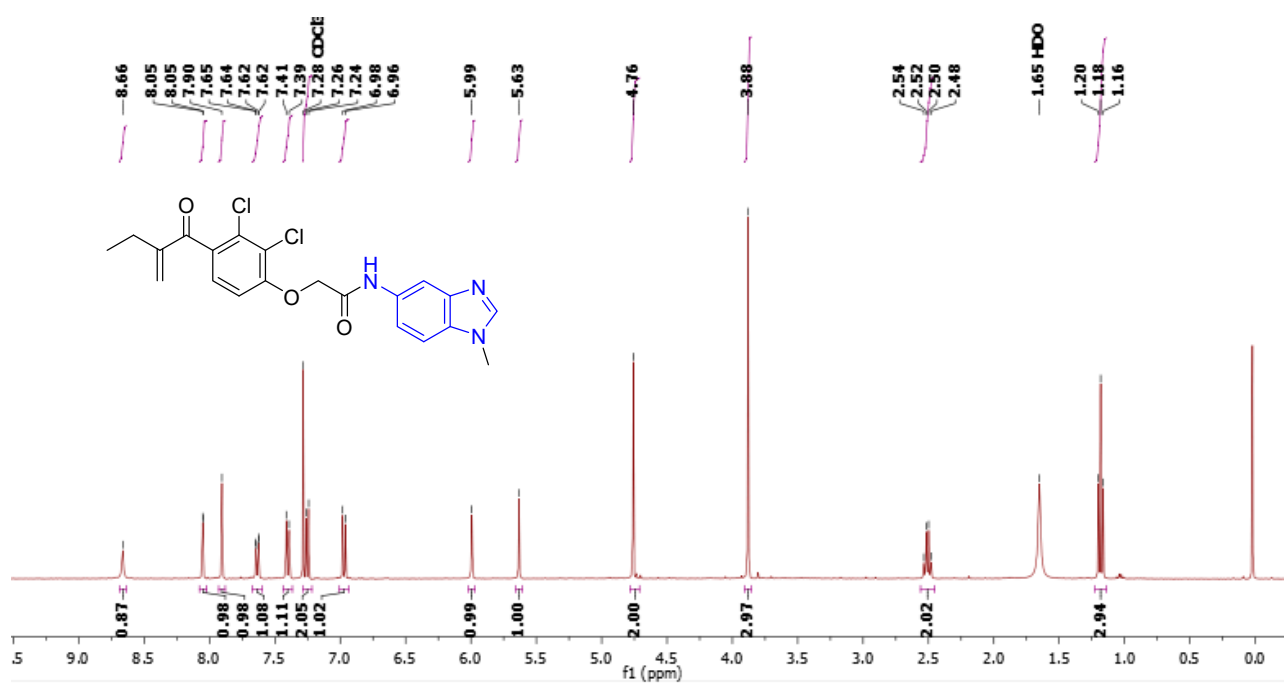

<sup>1</sup>H NMR spectrum (400 MHz, CDCl<sub>3</sub>) of compound 3

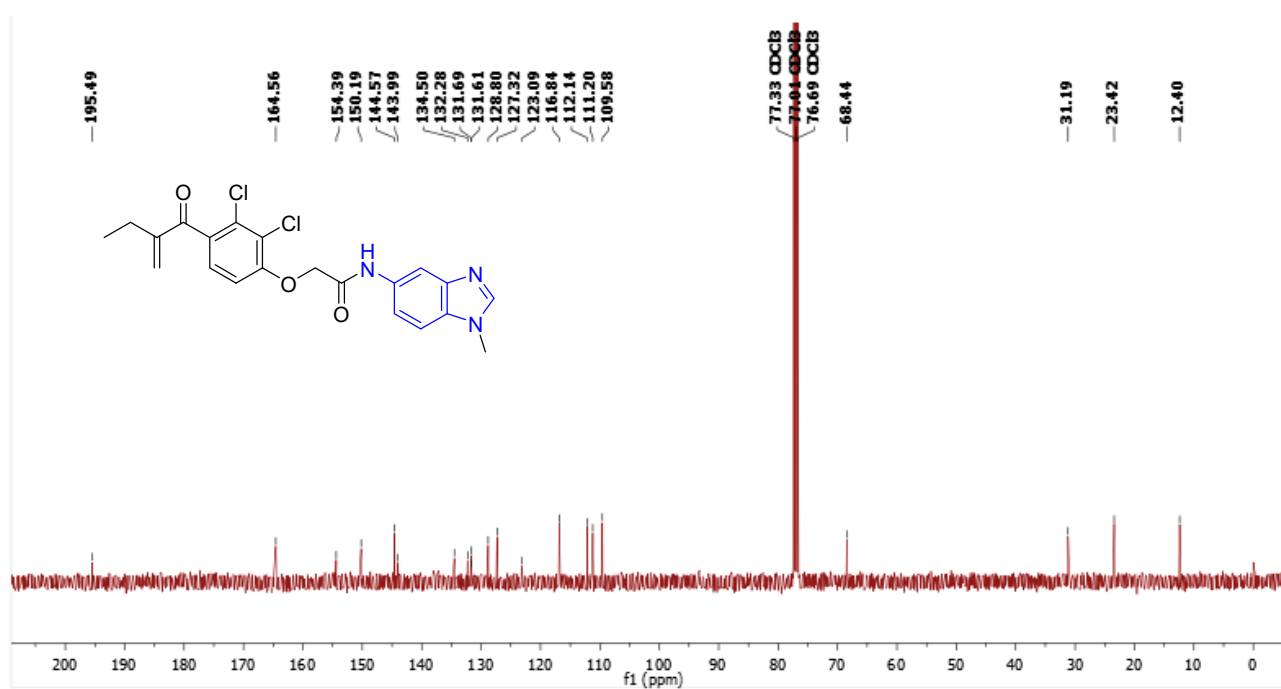

<sup>13</sup>C NMR spectrum (101 MHz, CDCl<sub>3</sub>) of compound 3

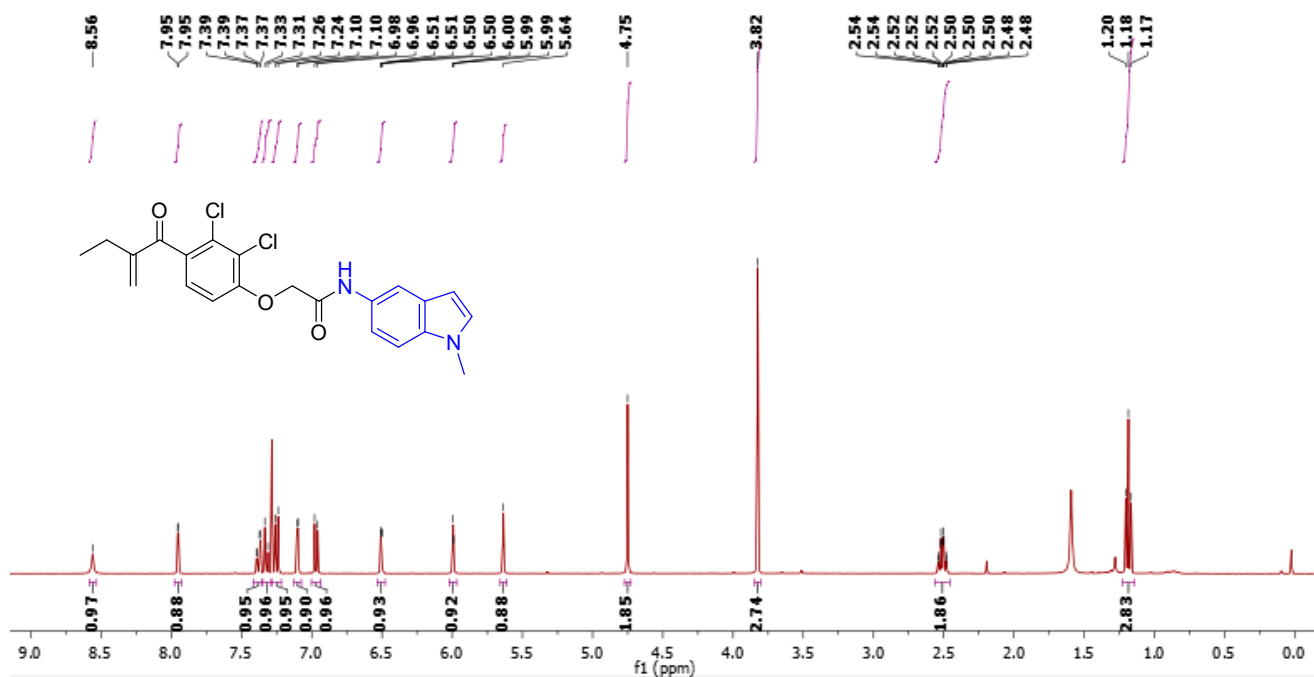

<sup>1</sup>H NMR spectrum (400 MHz, CDCl<sub>3</sub>) of compound 4

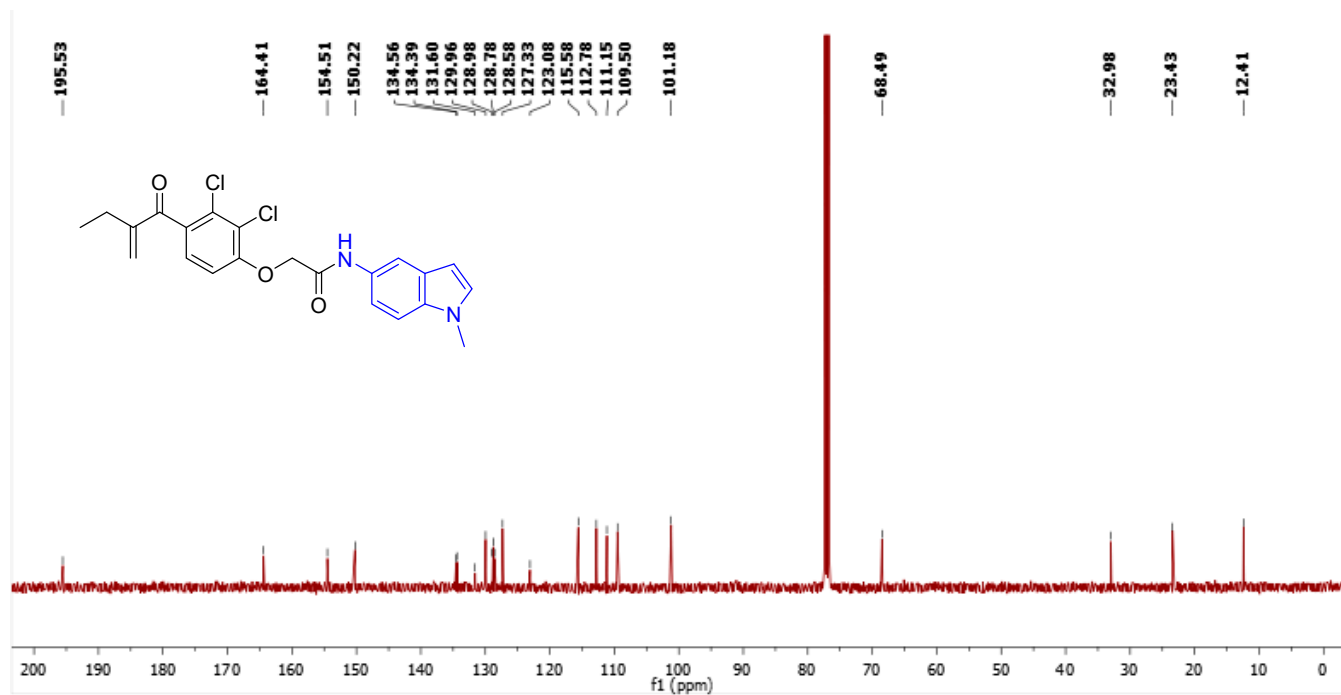

<sup>13</sup>C NMR spectrum (101 MHz, CDCl<sub>3</sub>) of compound 4

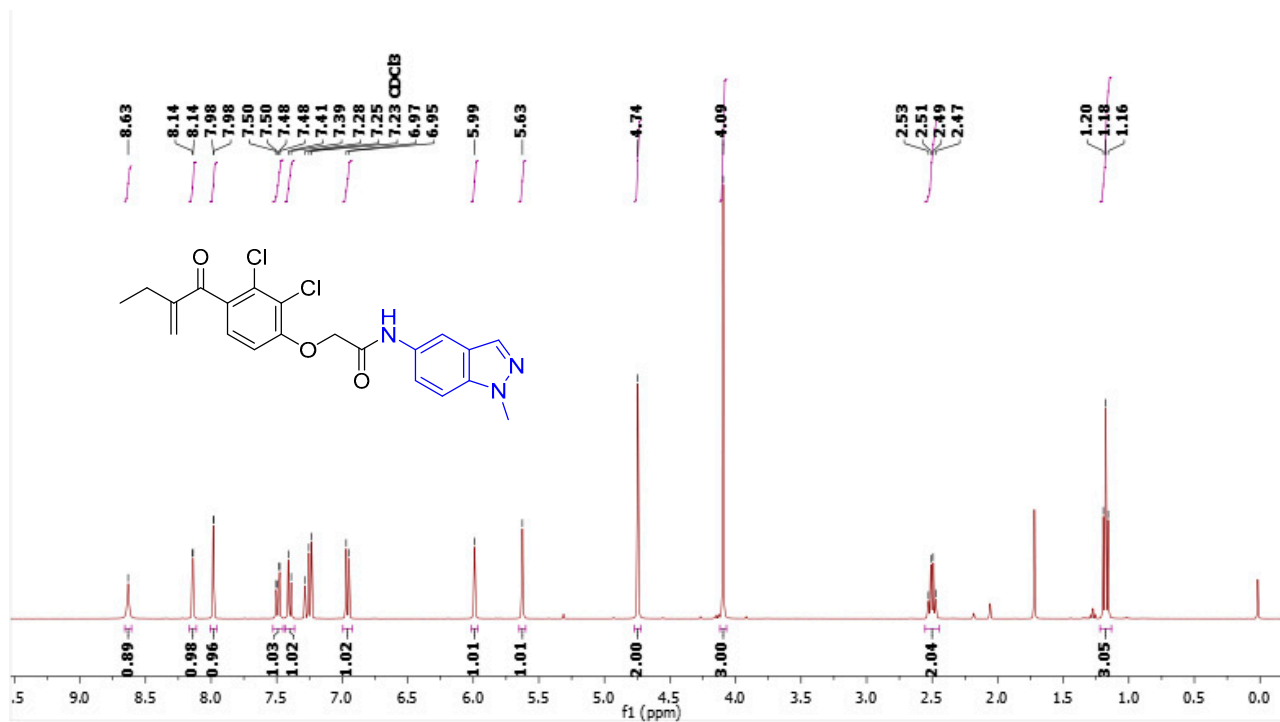

<sup>1</sup>H NMR spectrum (400 MHz, CDCl<sub>3</sub>) of compound 5

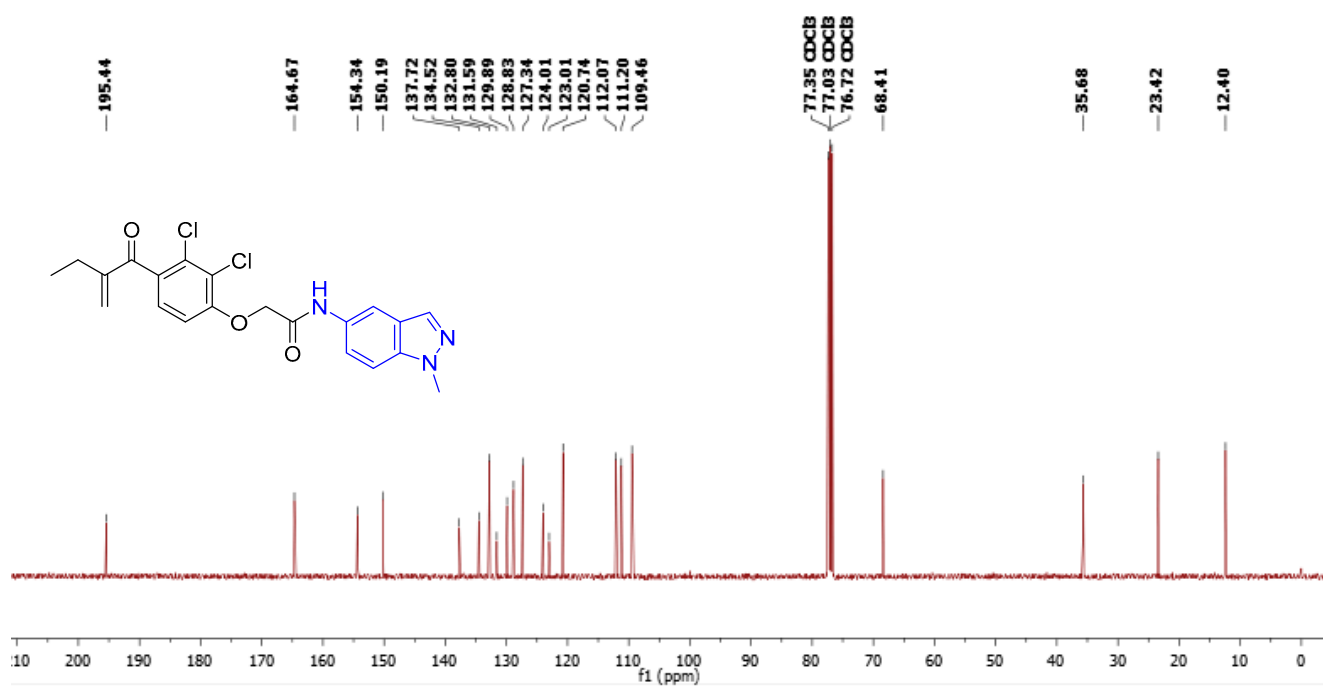

<sup>13</sup>C NMR spectrum (101 MHz, CDCl<sub>3</sub>) of compound 5

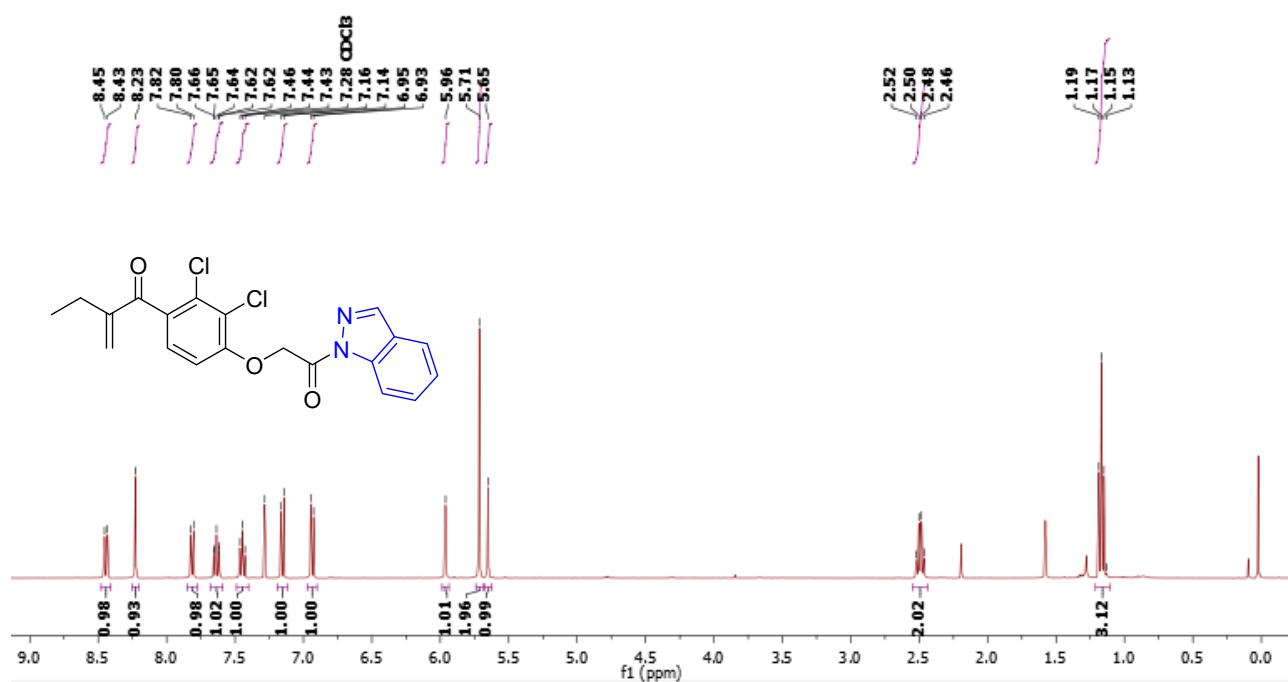

<sup>1</sup>H NMR spectrum (400 MHz, CDCl<sub>3</sub>) of compound 6

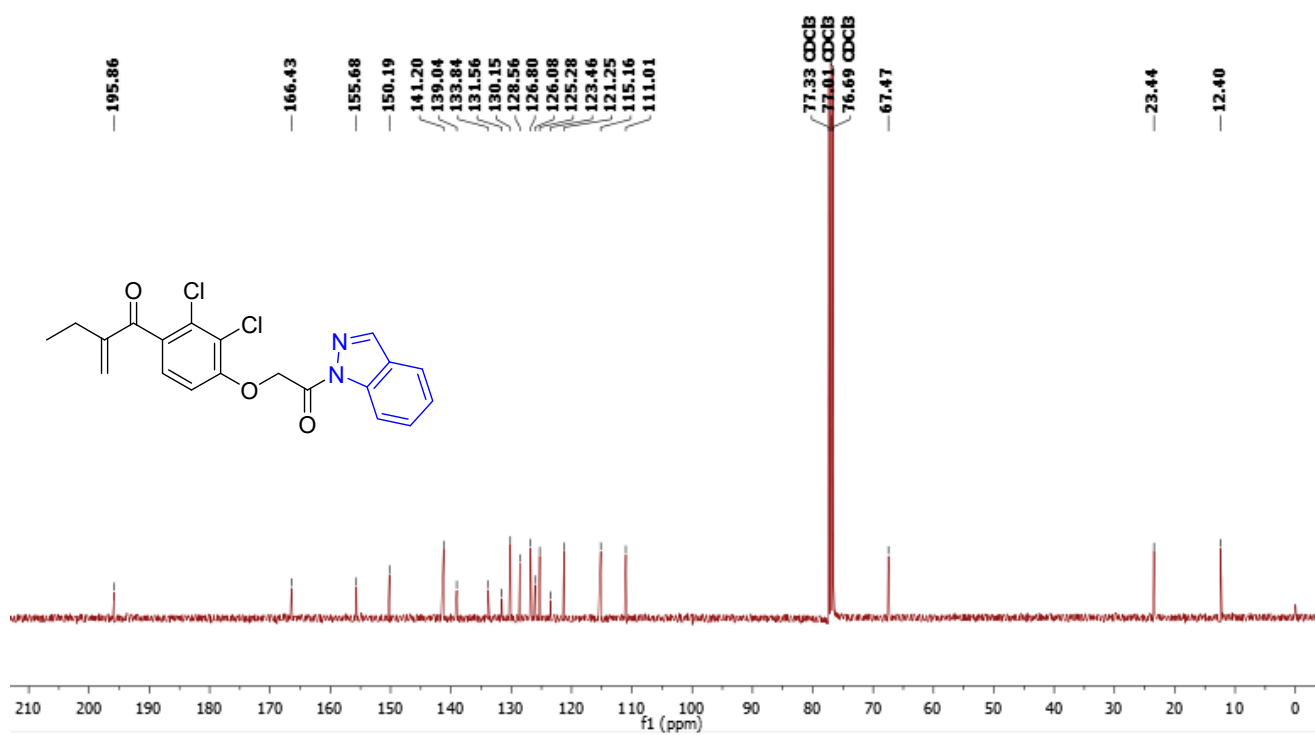

<sup>13</sup>C NMR spectrum (101 MHz, CDCl<sub>3</sub>) of compound 6

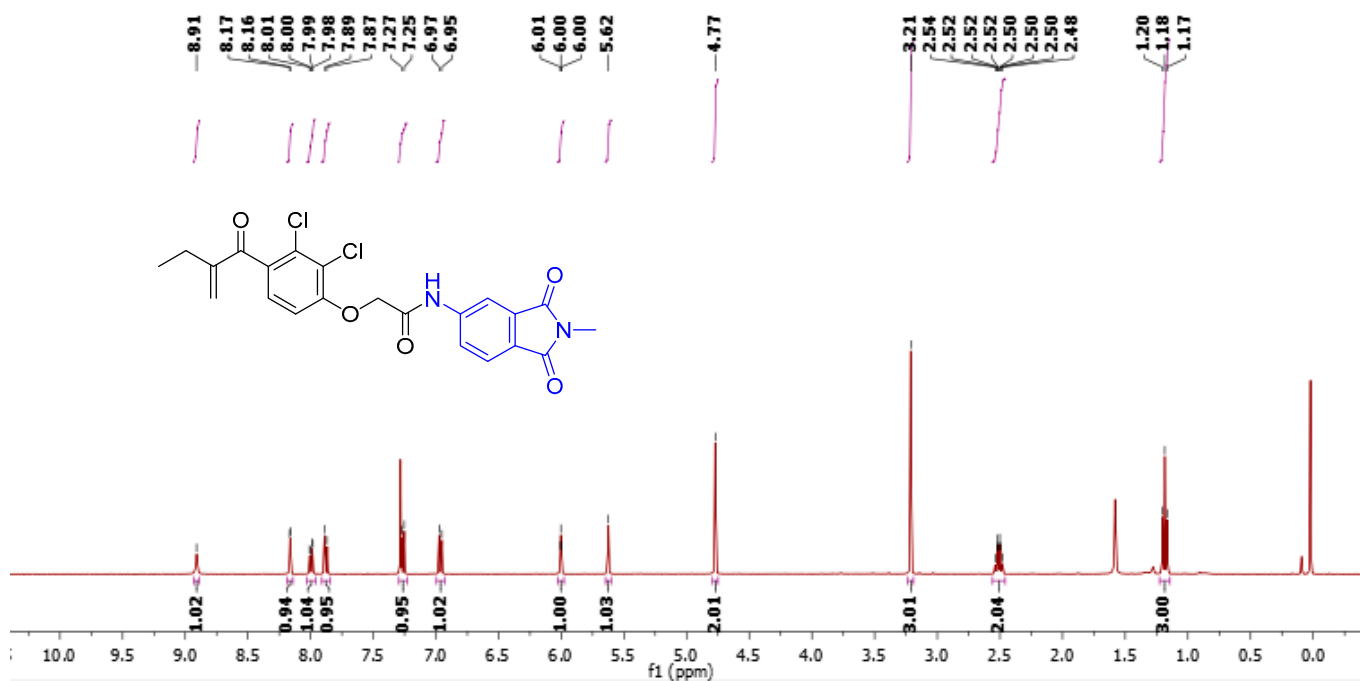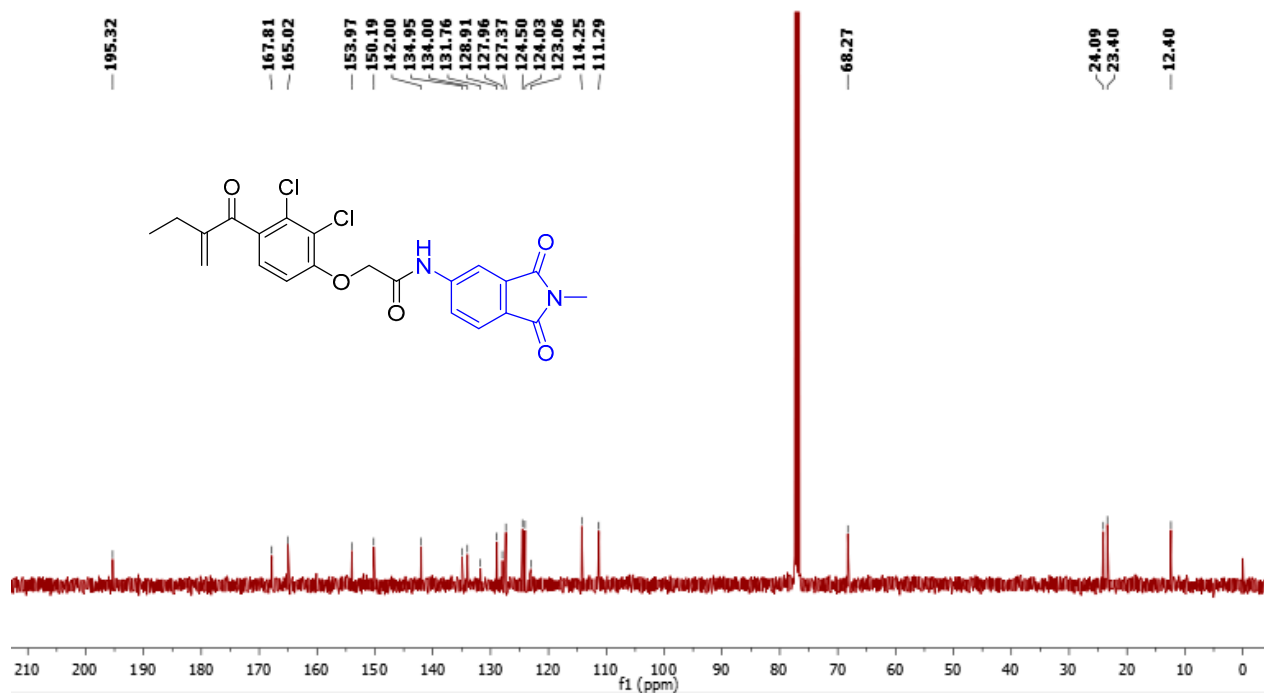



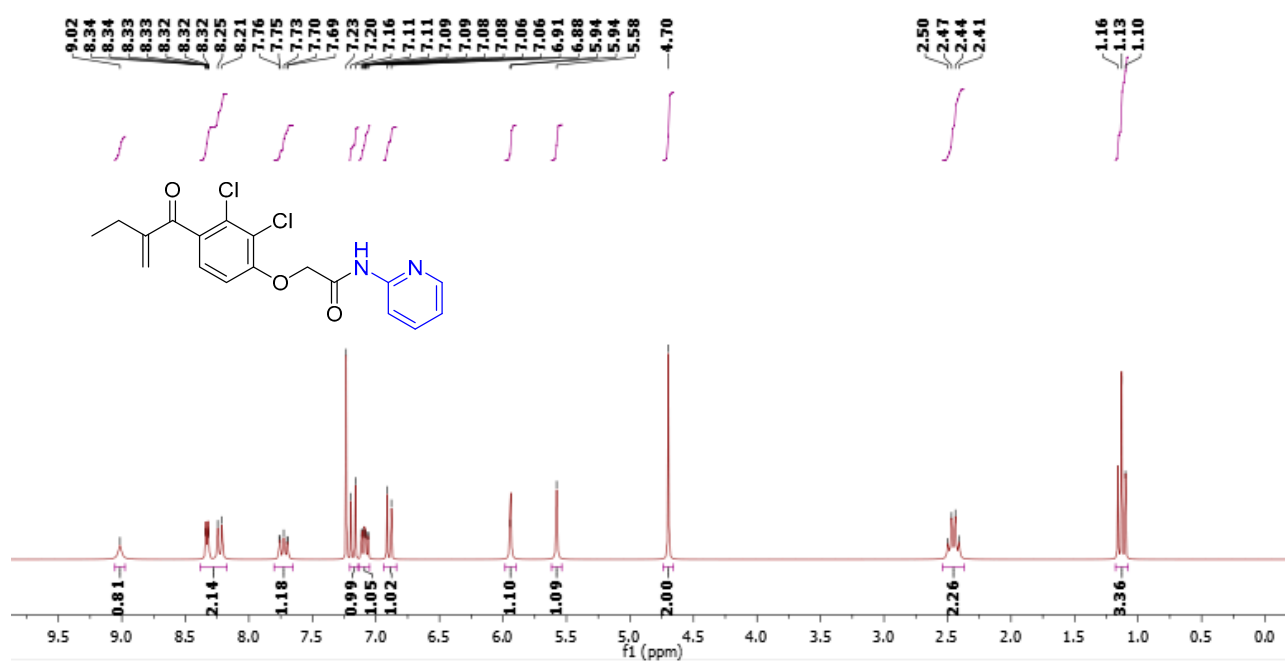

<sup>1</sup>H NMR spectrum (400 MHz, CDCl<sub>3</sub>) of compound **8**

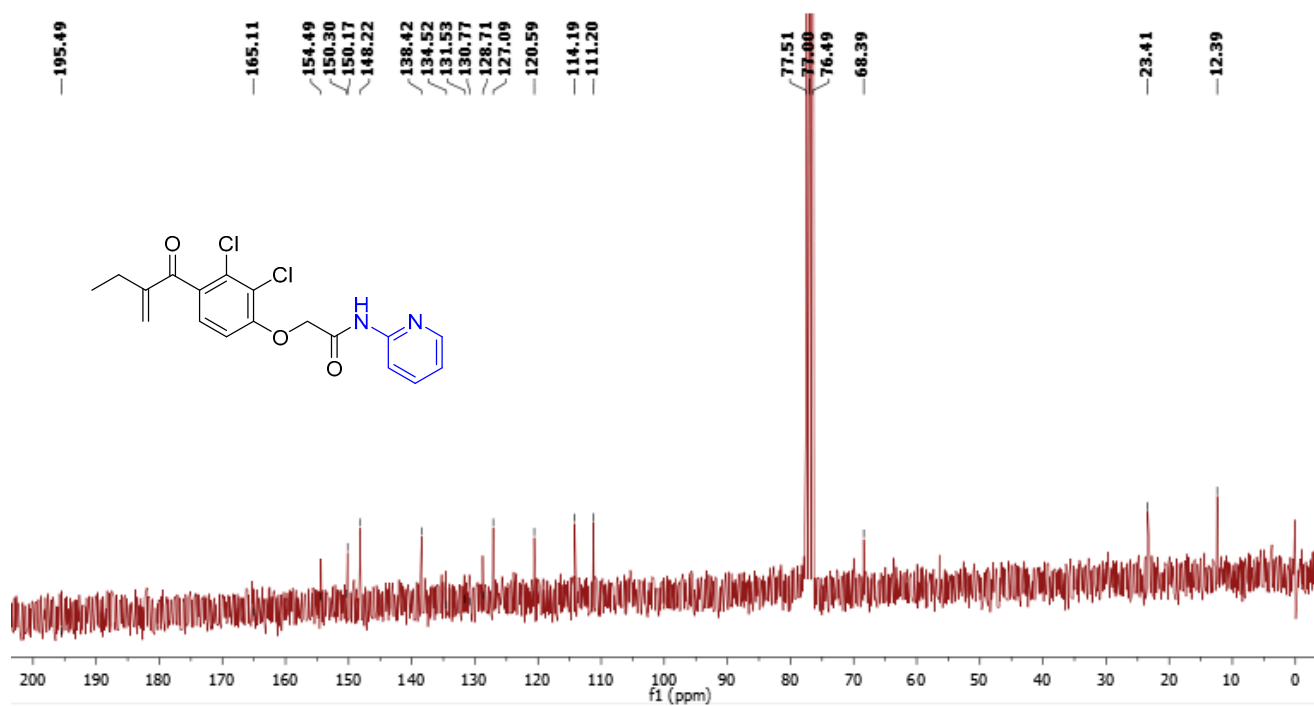

<sup>13</sup>C NMR spectrum (101 MHz, CDCl<sub>3</sub>) of compound **8**

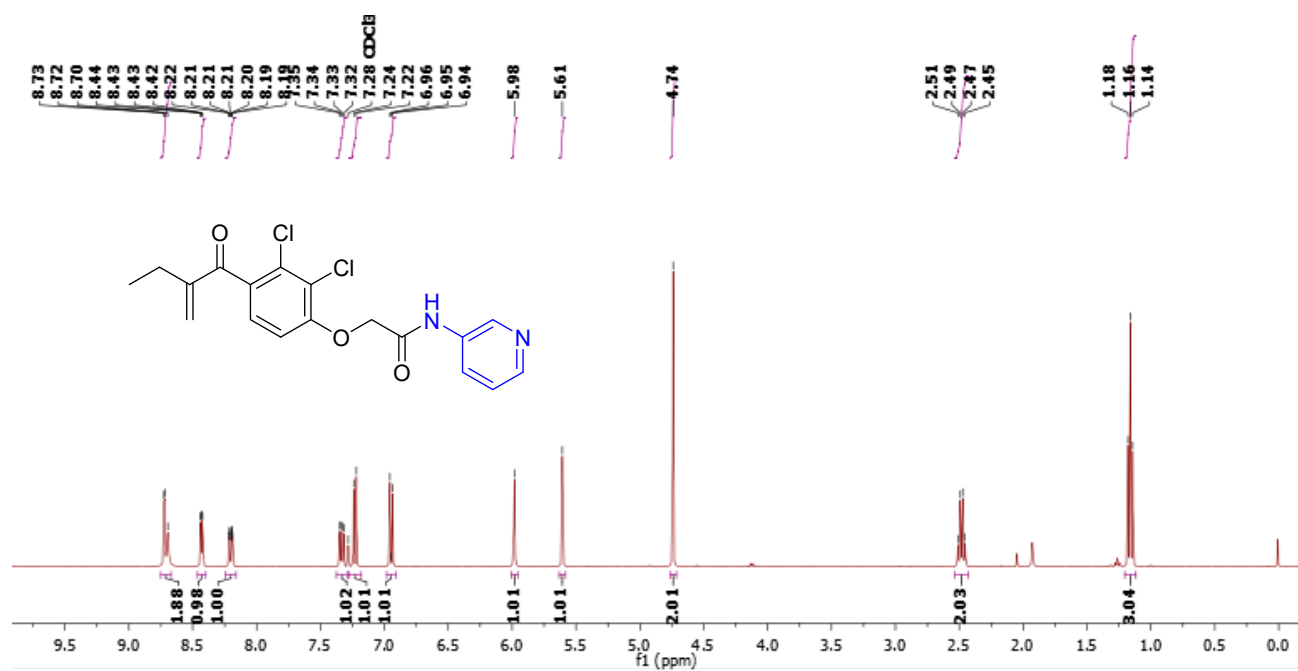

<sup>1</sup>H NMR spectrum (400 MHz, CDCl<sub>3</sub>) of compound **9**

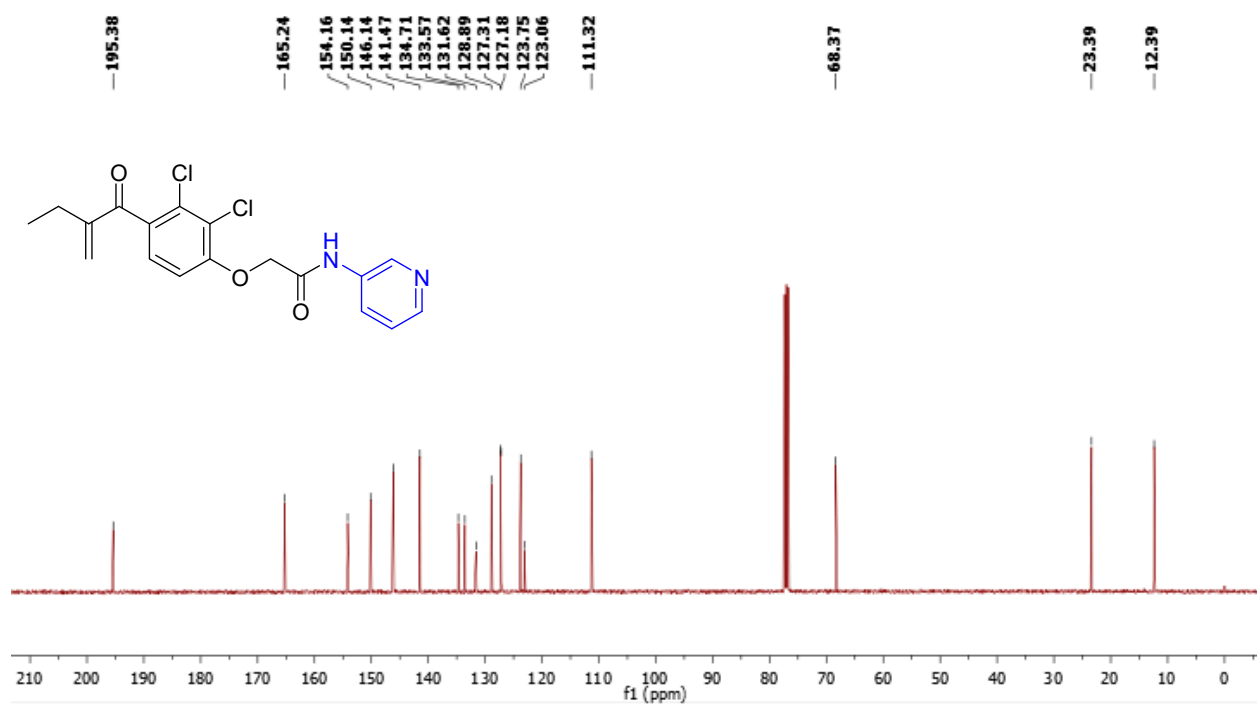

<sup>13</sup>C NMR spectrum (101 MHz, CDCl<sub>3</sub>) of compound **9**

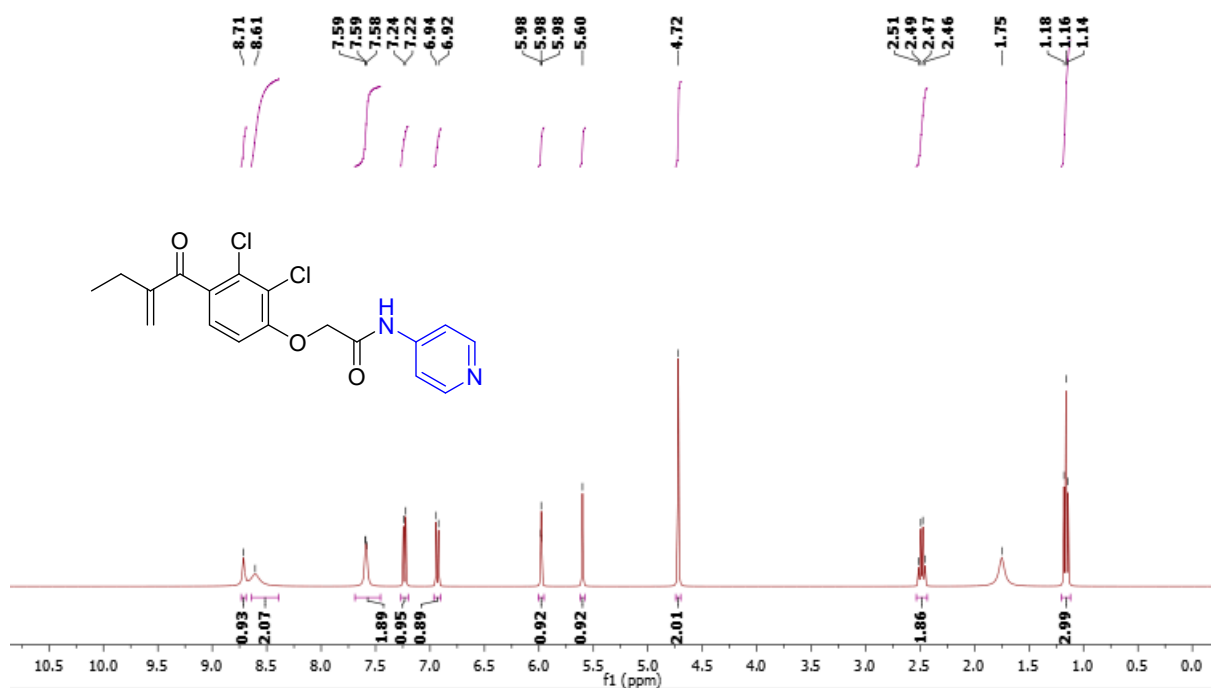

<sup>1</sup>H NMR spectrum (400 MHz, CDCl<sub>3</sub>) of compound **10**

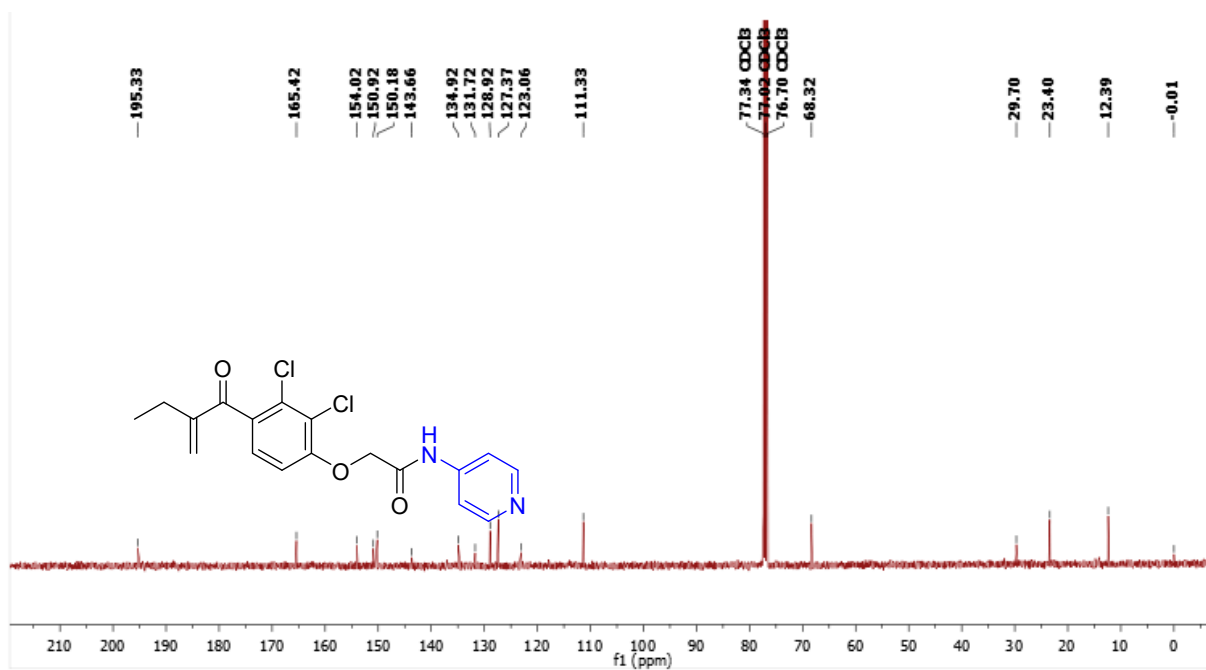

<sup>13</sup>C NMR spectrum (101 MHz, CDCl<sub>3</sub>) of compound **10**

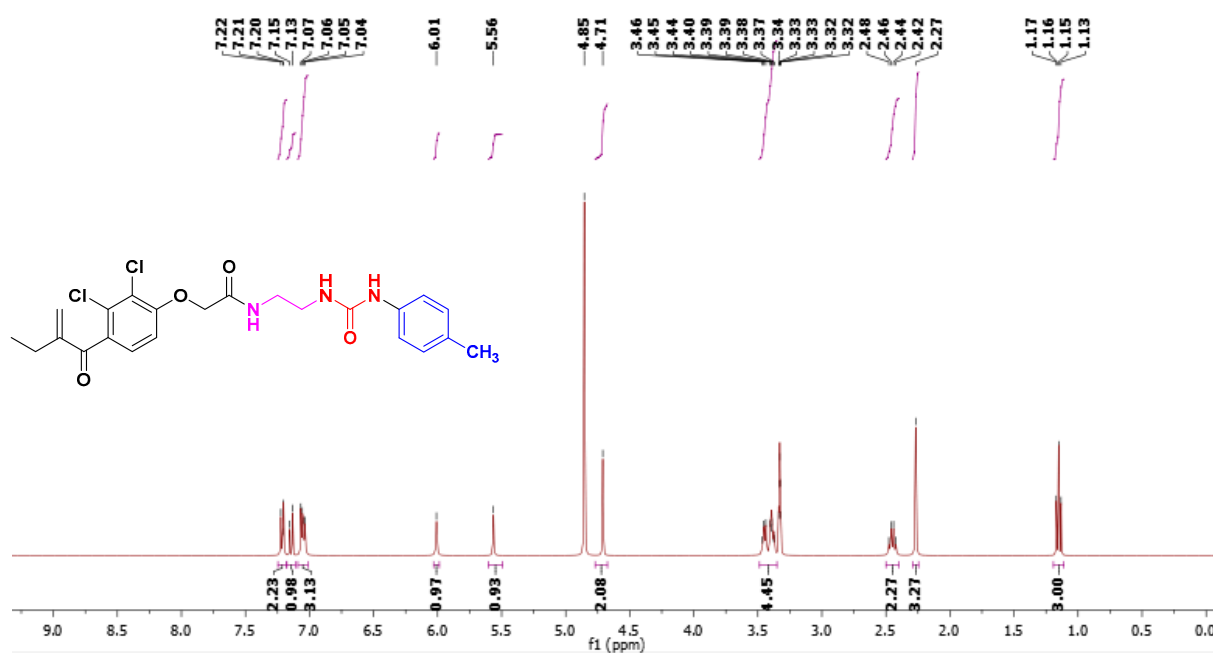

<sup>1</sup>H NMR spectrum (400 MHz, CD<sub>3</sub>OD) of compound **16a**

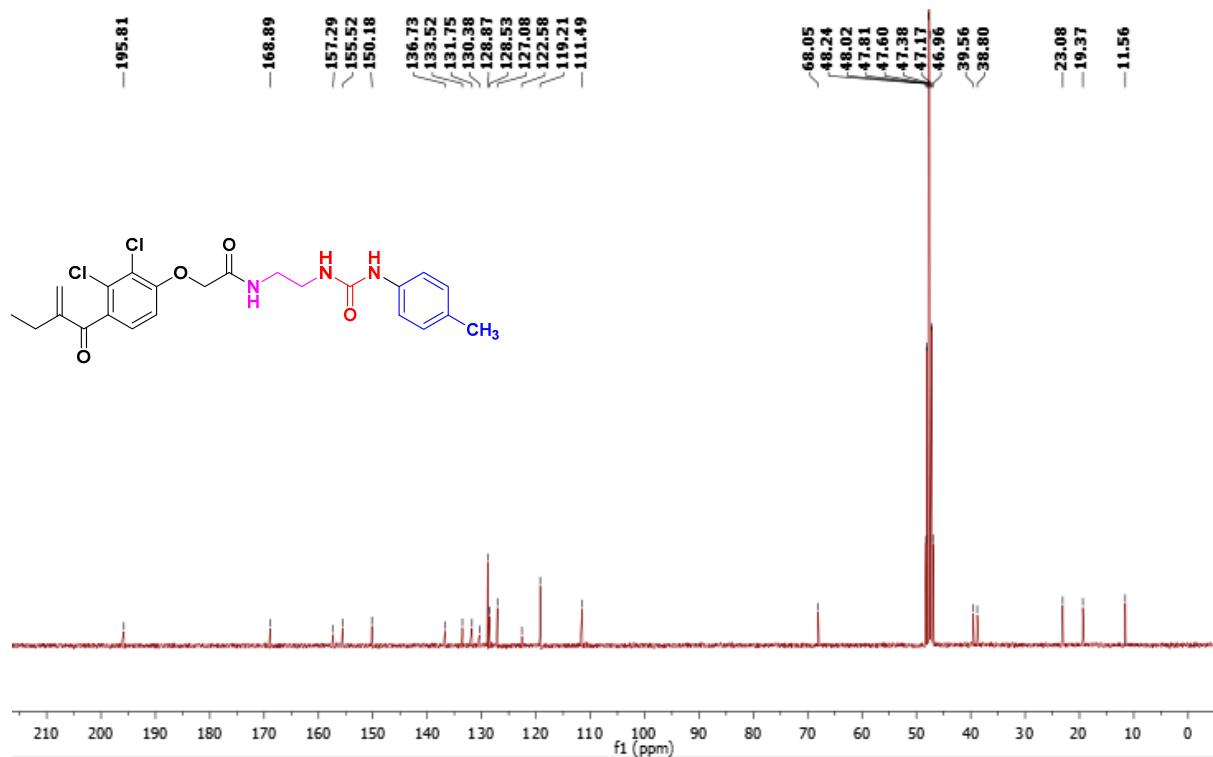

<sup>13</sup>C NMR spectrum (101 MHz, CD<sub>3</sub>OD) of compound **16a**

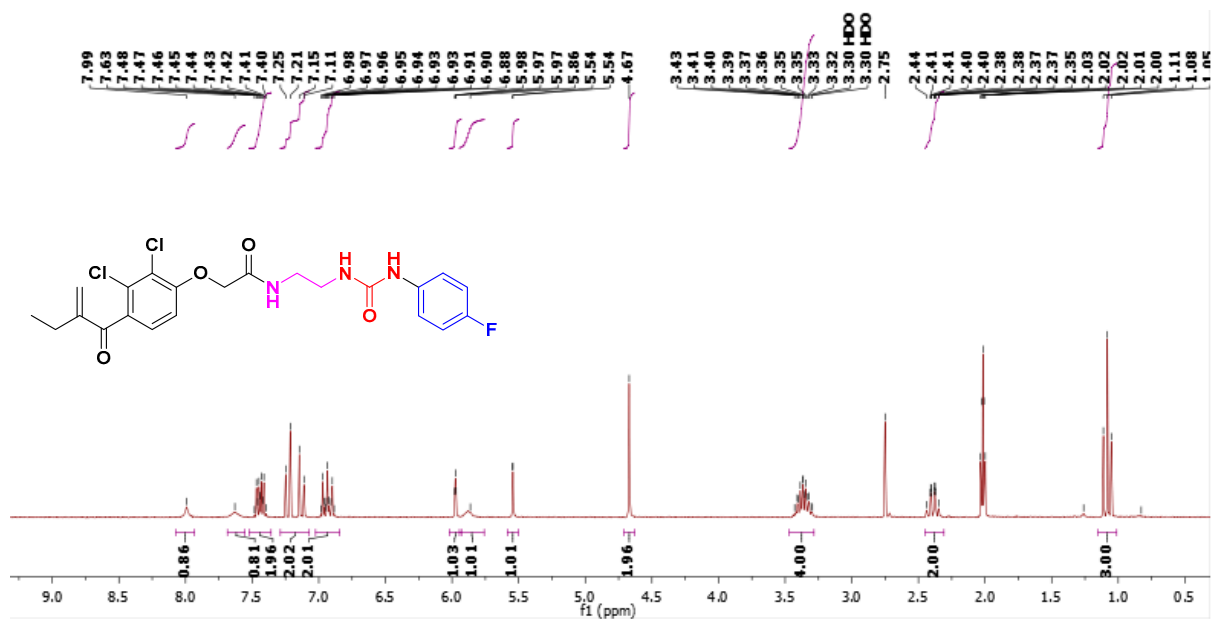

<sup>1</sup>H NMR spectrum (400 MHz, (CD<sub>3</sub>)<sub>2</sub>CO) of compound **16b**

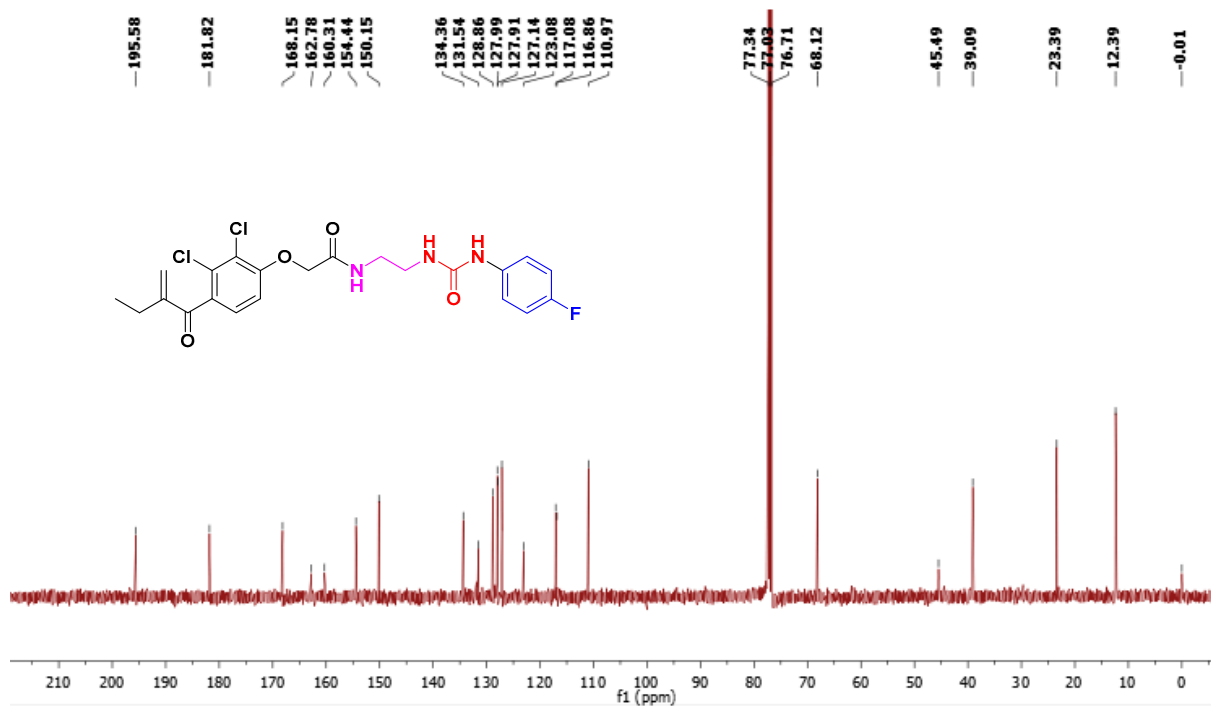

<sup>13</sup>C NMR spectrum (101 MHz, CDCl<sub>3</sub>) of compound **16b**

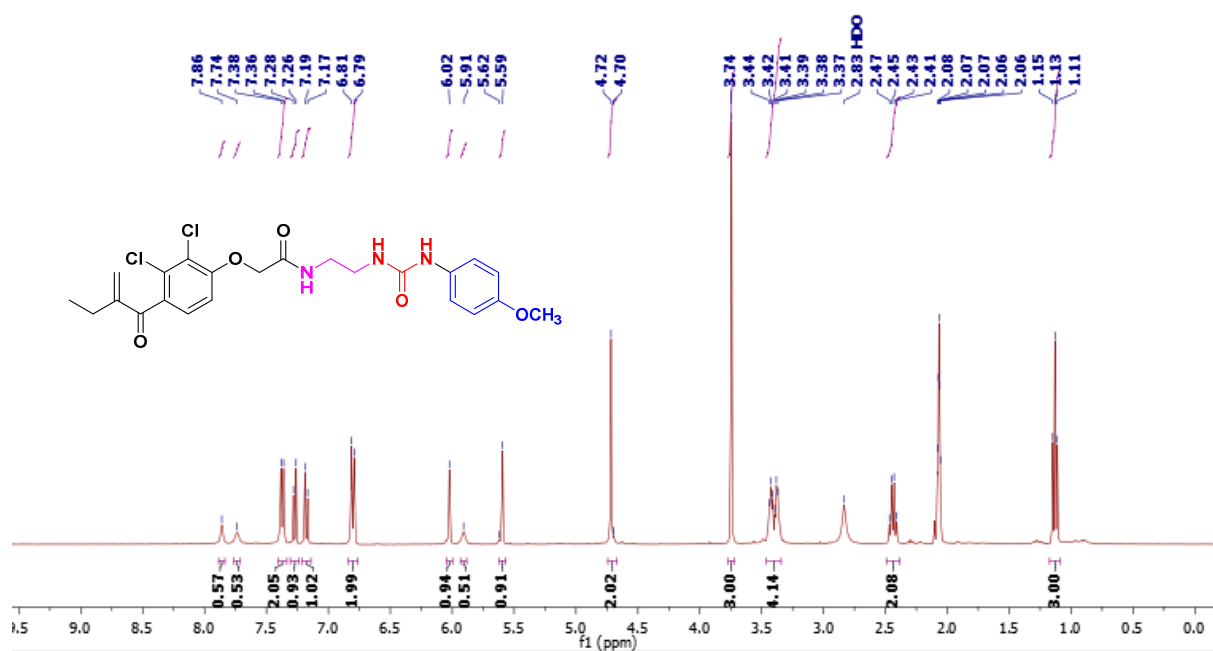

<sup>1</sup>H NMR spectrum (400 MHz, (CD<sub>3</sub>)<sub>2</sub>CO) of compound **16c**

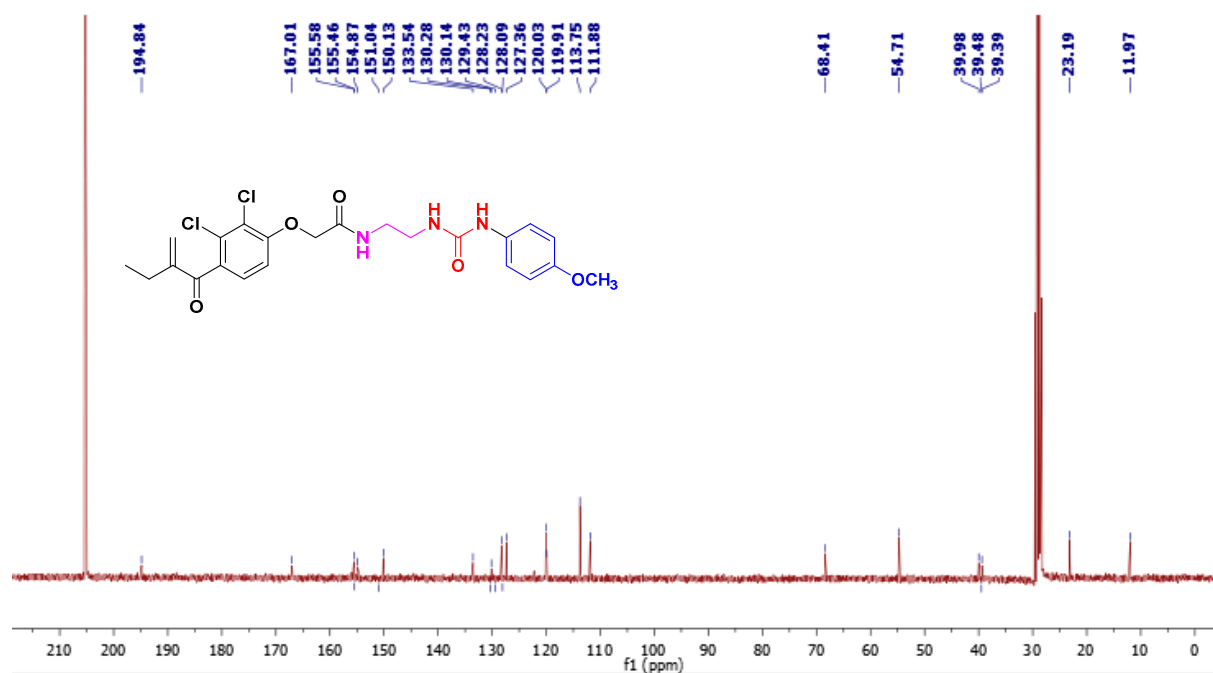

<sup>13</sup>C NMR spectrum (101 MHz, (CD<sub>3</sub>)<sub>2</sub>CO) of compound **16c**

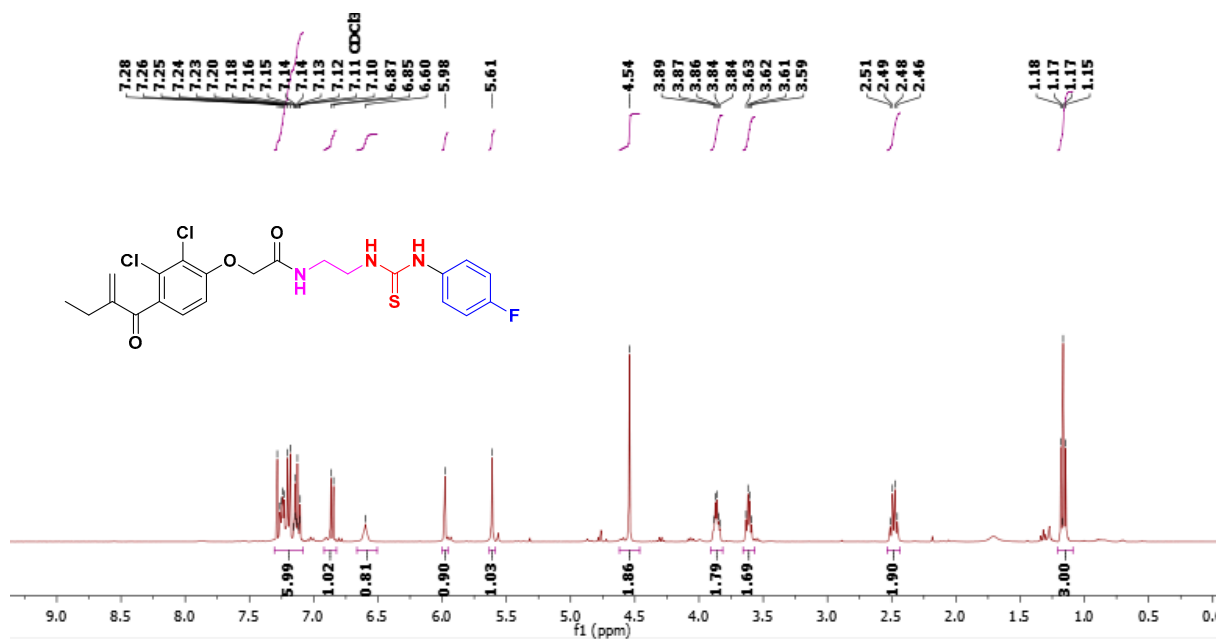

<sup>1</sup>H NMR spectrum (400 MHz, CDCl<sub>3</sub>) of compound **17b**

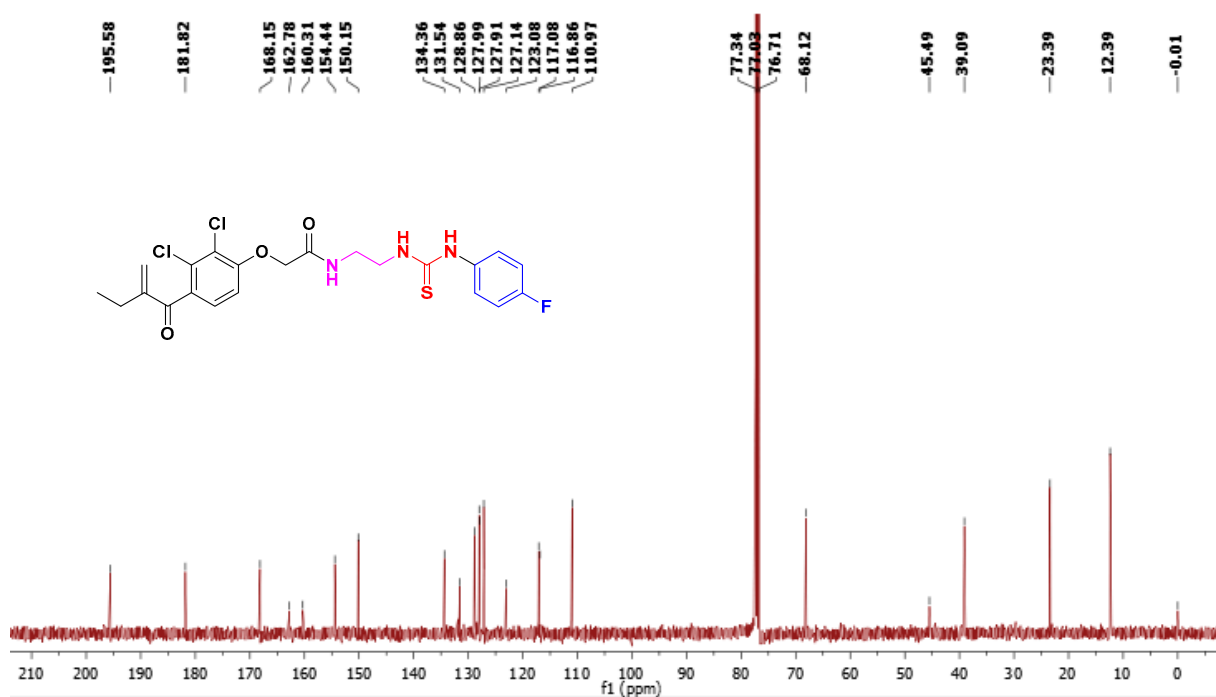

<sup>13</sup>C NMR spectrum (101 MHz, CDCl<sub>3</sub>) of compound **17b**

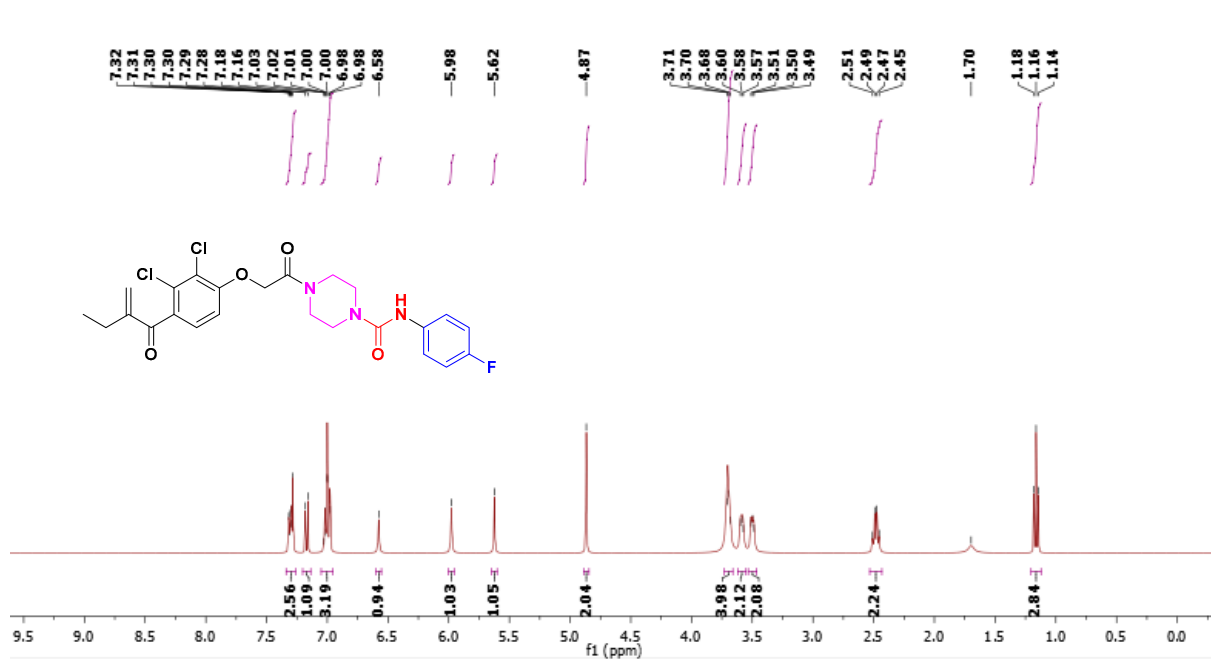

<sup>1</sup>H NMR spectrum (400 MHz, CDCl<sub>3</sub>) of compound **18**

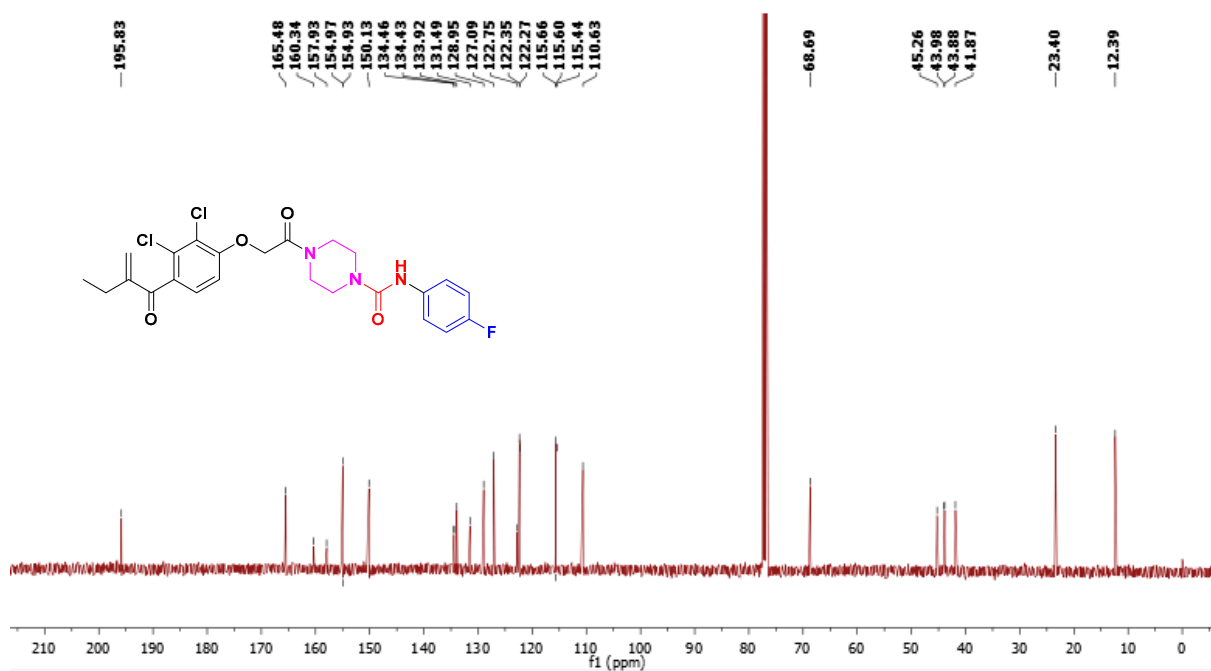

<sup>13</sup>C NMR spectrum (101 MHz, CDCl<sub>3</sub>) of compound **18**



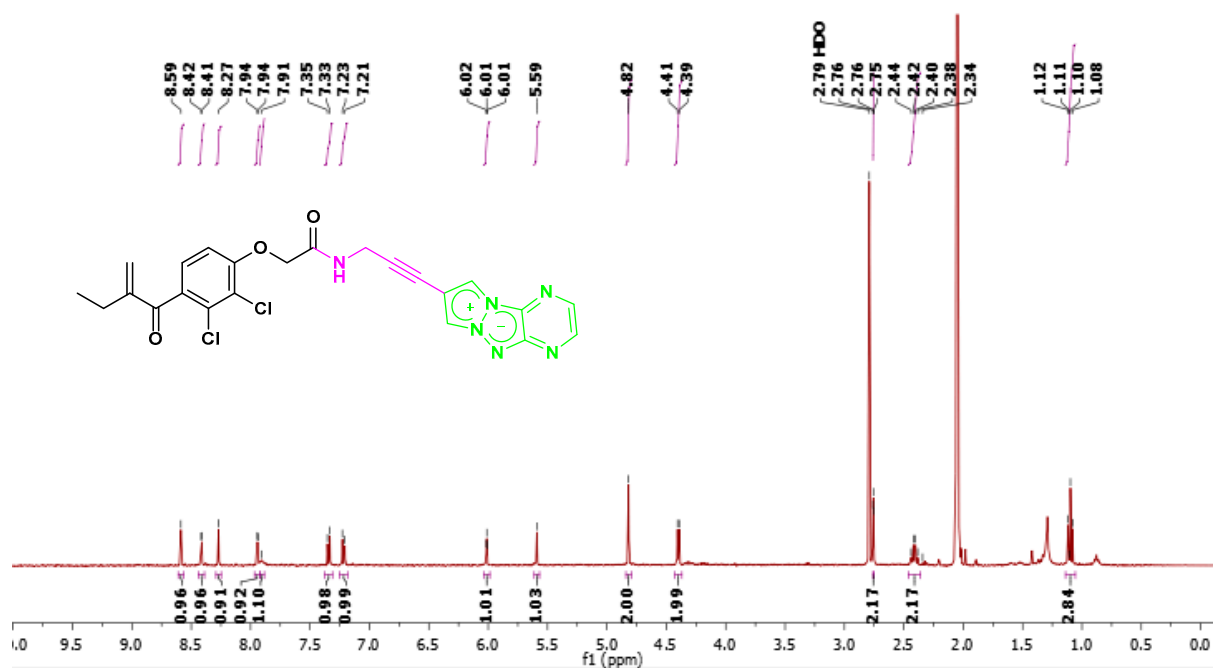

<sup>1</sup>H NMR spectrum (400 MHz, (CD<sub>3</sub>)<sub>2</sub>CO) of compound **22**

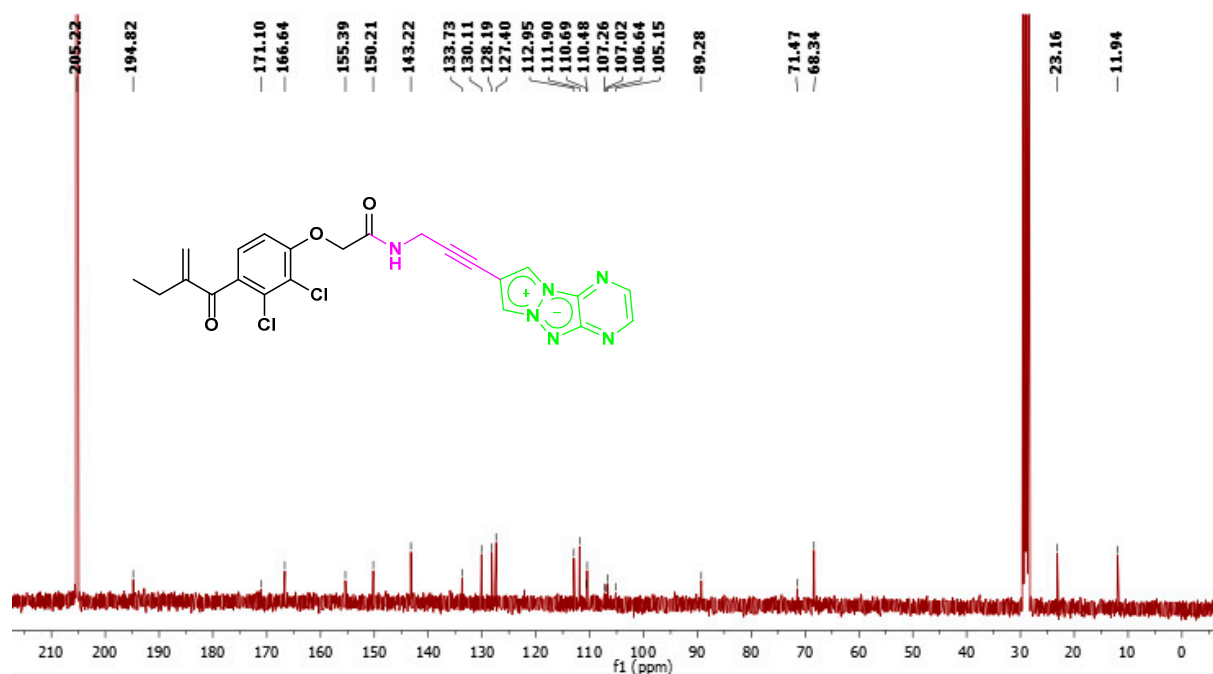

<sup>13</sup>C NMR spectrum (101 MHz, (CD<sub>3</sub>)<sub>2</sub>CO) of compound **22**

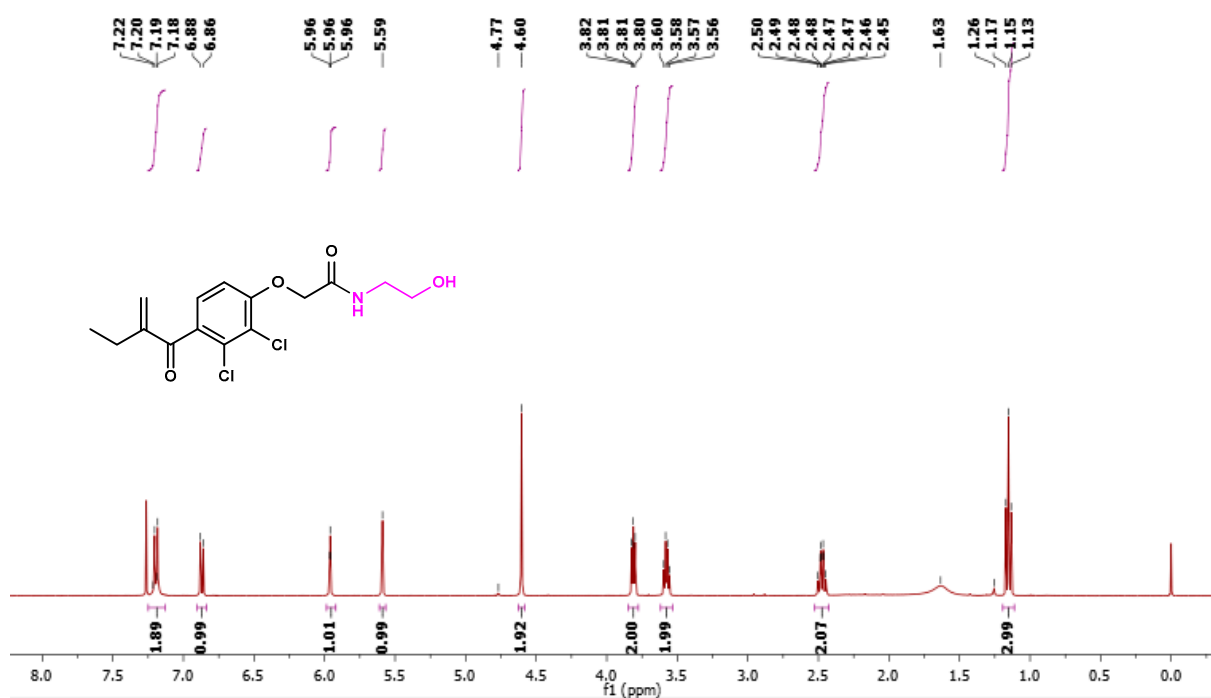

<sup>1</sup>H NMR spectrum (400 MHz, CDCl<sub>3</sub>) of compound **23**

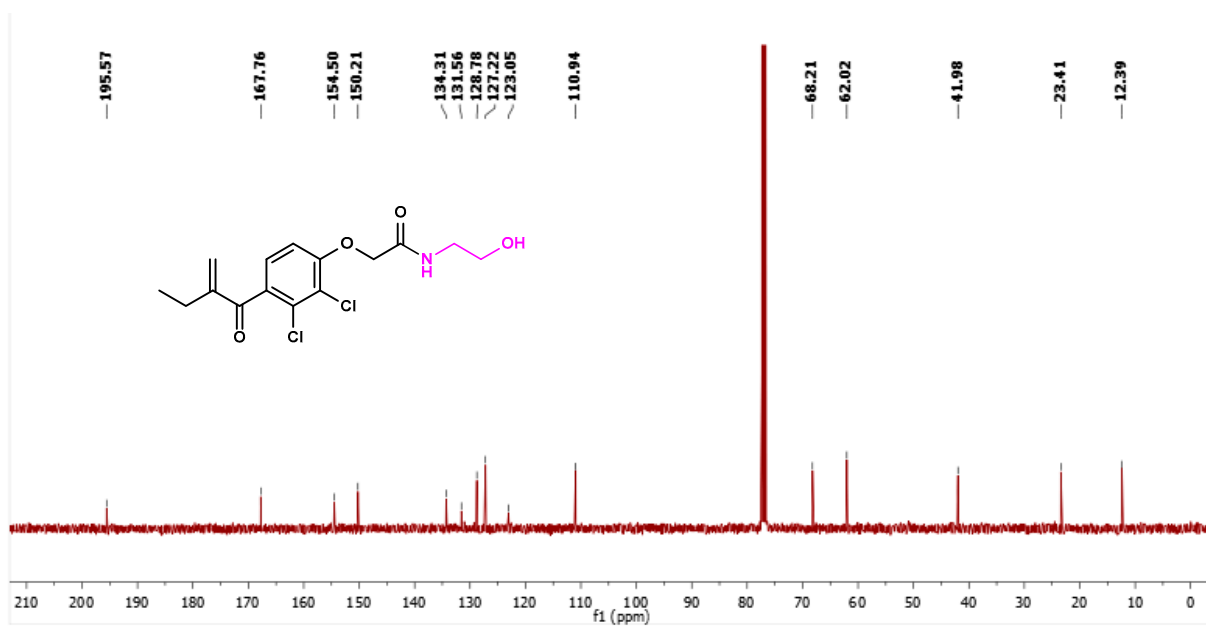

<sup>13</sup>C NMR spectrum (101 MHz, CDCl<sub>3</sub>) of compound **23**

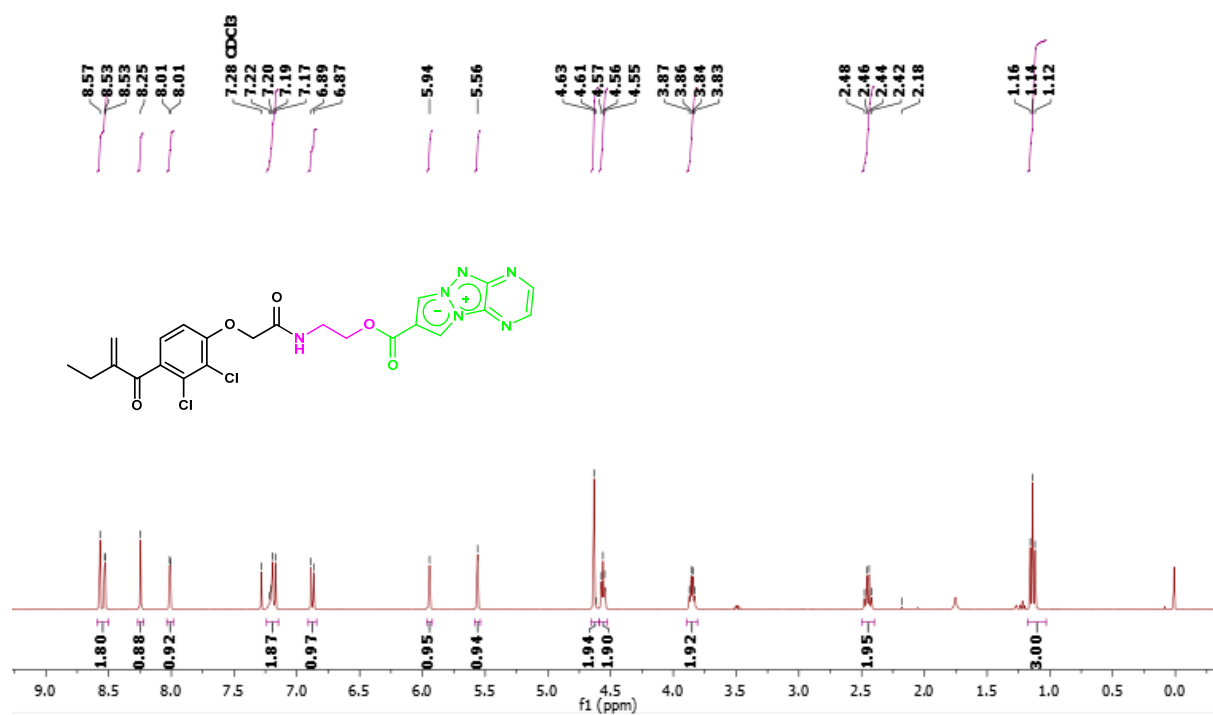

<sup>1</sup>H NMR spectrum (400 MHz, CDCl<sub>3</sub>) of compound **24**

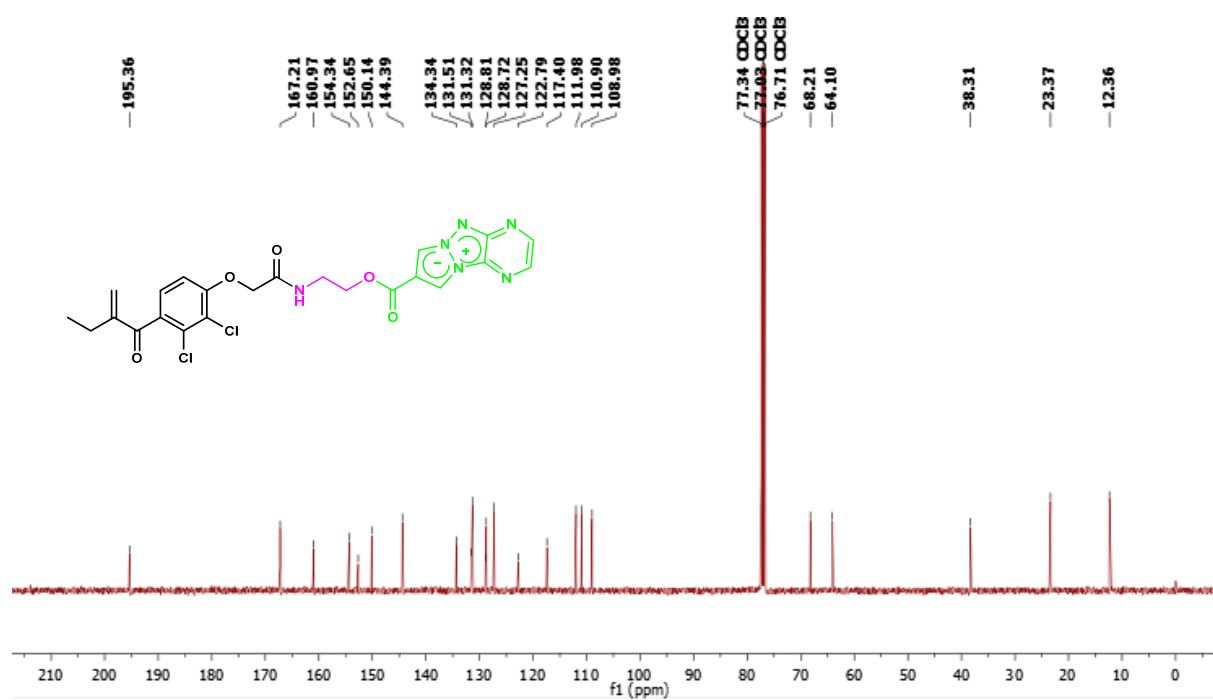

<sup>13</sup>C NMR spectrum (101 MHz, CDCl<sub>3</sub>) of compound **24**
